# Supplementary material for: Transcriptional factor specificity protein 1 (SP1) promotes the proliferation of glioma cells by up-regulating midkine (MDK)
Source: PubMed Central journal article supplement — Mol Biol Cell. 2015 Feb 1;26(3):430–9. doi: 10.1091/mbc.E14-10-1443 (PMC4310735; doi:10.1091/mbc.e14-10-1443), 2015-02-01
Supplement: supp_E14-10-1443v1_CombinedSupMats.pdf [file supp_E14-10-1443v1_CombinedSupMats.pdf]

# Supplemental Materials

*Molecular Biology of the Cell*

Luo et al.

**Additional files 1 High expression of MDK in glioma samples.** Data were extracted from the REpository for Molecular BRAIn Neoplasia DaTa (REMBRANDT) (<http://rembrandt.nci.nih.gov> for more information) and plotted in Microsoft EXCEL.

**Additional files 2 Kaplan-Meier survival plot of samples with differential MDK gene expression.** Data were extracted from the REpository for Molecular BRAIn Neoplasia DaTa (REMBRANDT) (<http://rembrandt.nci.nih.gov> for more information) and plotted in Microsoft EXCEL.

**Additional files 3 MDK copy number in glioma.** Data were extracted from the oncomine webpage (<https://www.oncomine.org>) and plotted in Microsoft EXCEL.

**Additional files 4 High expression of SP1 in glioma samples.** Data were extracted from the REpository for Molecular BRAIn Neoplasia DaTa (REMBRANDT) (<http://rembrandt.nci.nih.gov> for more information) and plotted in Microsoft EXCEL.

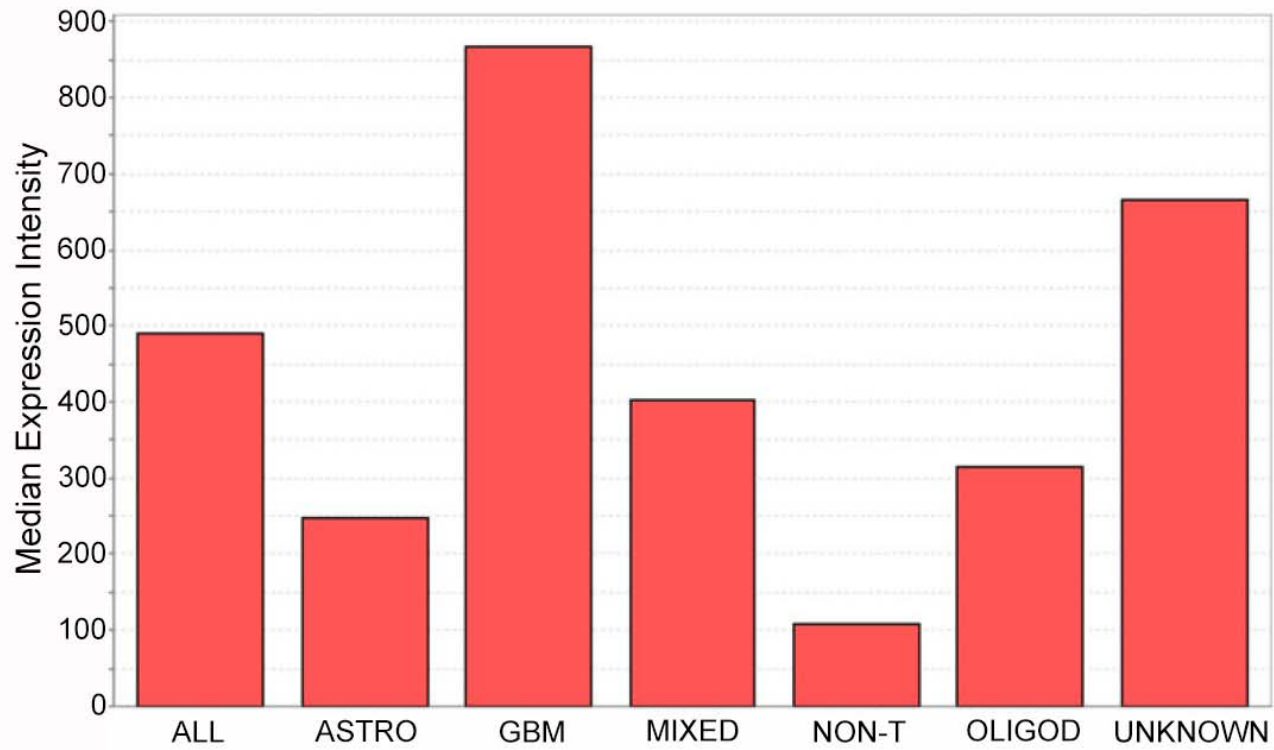

#### Abbreviations of Group Names

|                    |                       |
|--------------------|-----------------------|
| ALL:               | ALL GLIOMA(454)       |
| ASTRO:             | ASTROCYTOMA(148)      |
| GBM:               | GBM(228)              |
| MIXED:             | MIXED(11)             |
| NON-TUMOR:         | NON-TUMOR(28)         |
| OLIGODENDROGLIOMA: | OLIGODENDROGLIOMA(67) |
| UNKNOWN:           | UNKNOWN(67)           |

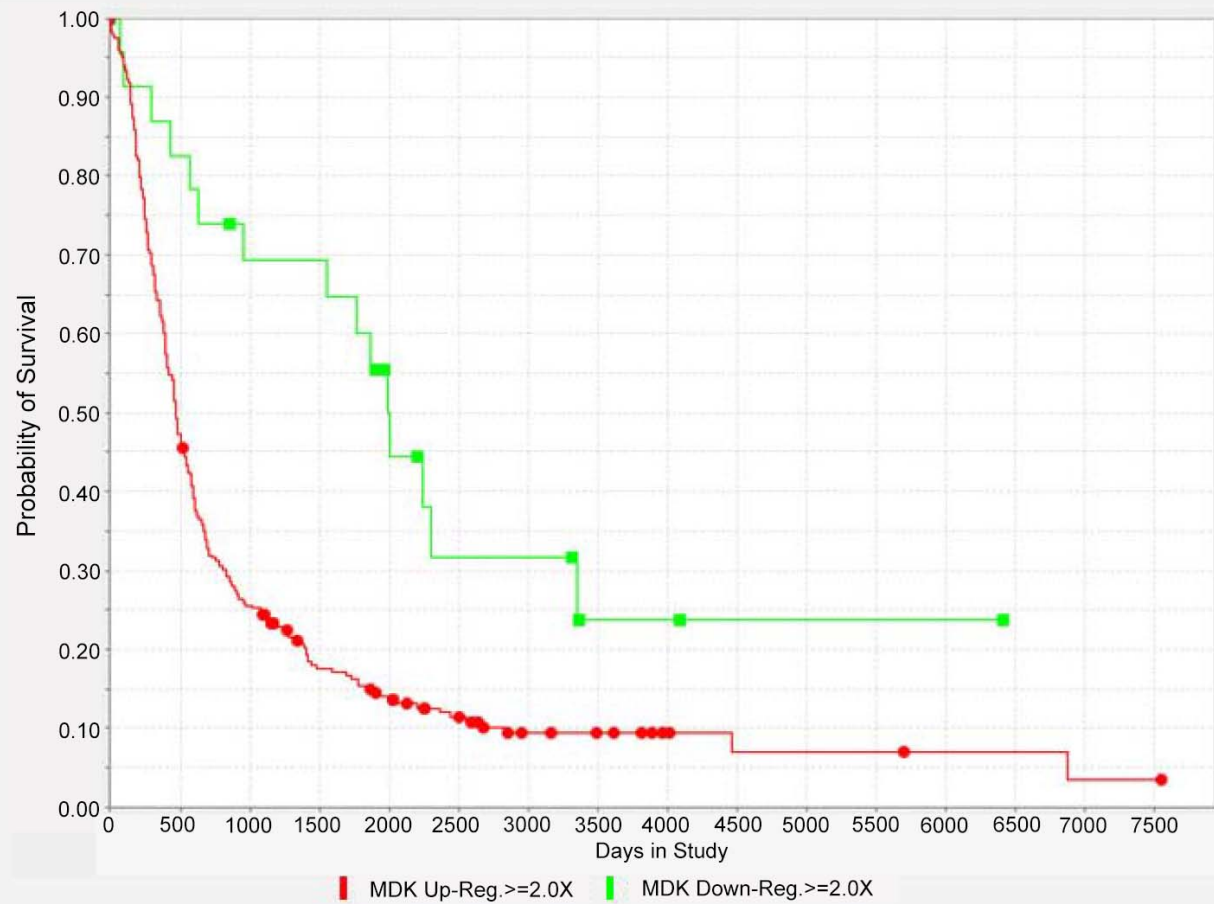

**Statistical Report:**

MDK  
 Reporter:209035\_at (Lowest Geometric Mean Intensity)

Number of samples in group:

Up-Regulated: 268

Down-Regulated: 23

Log-rank p-value (for significance of difference of survival between group of samples)

Up-Regulated vs.Down-Regulated: 3.99596E-4

Reporter: 11-046360572 ▾

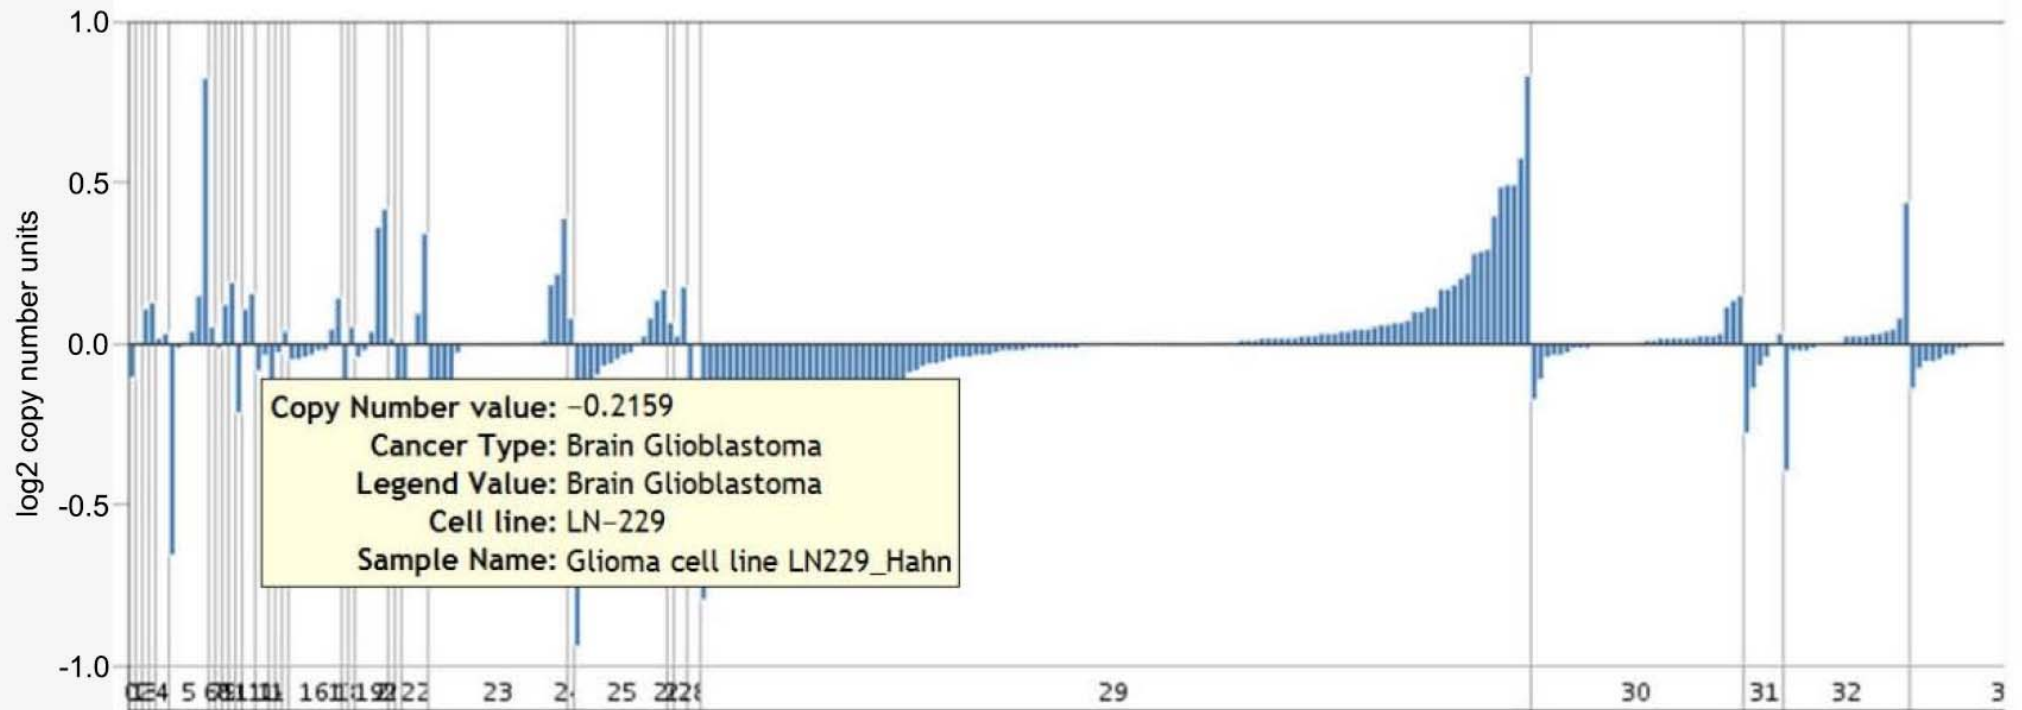

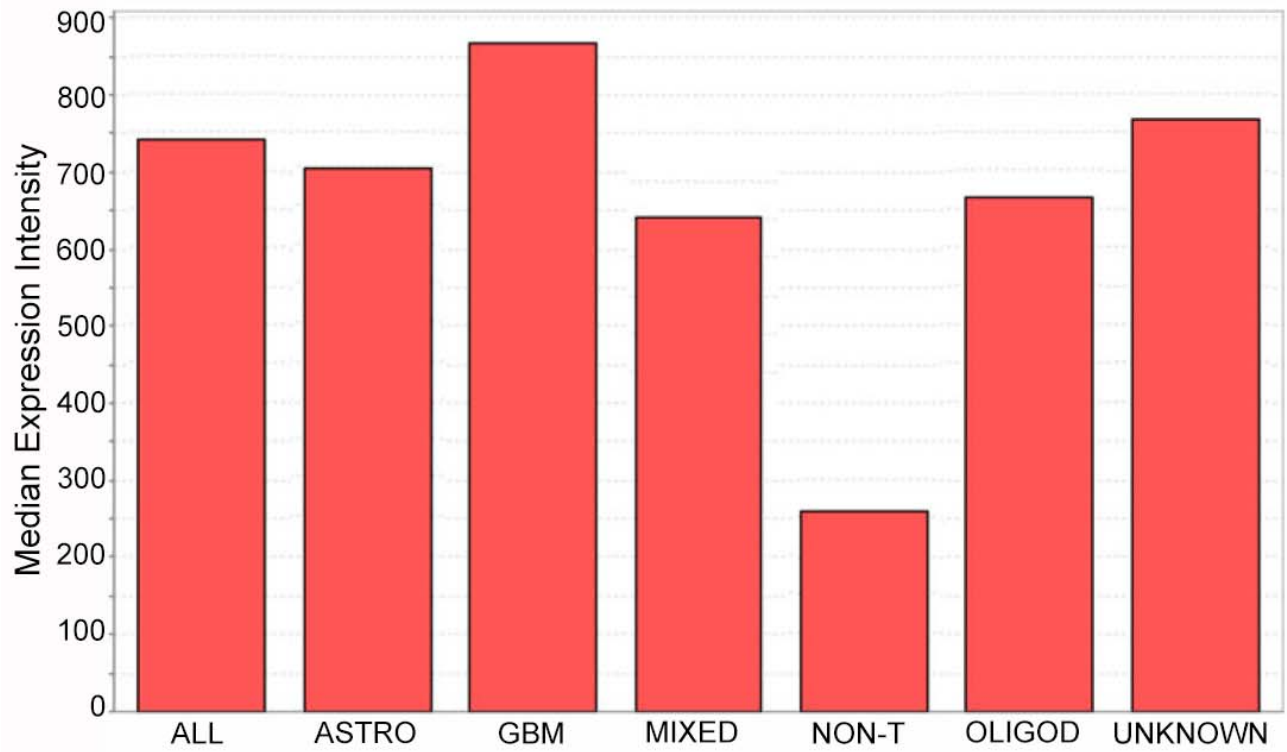

#### Abbreviations of Group Names

|                    |                       |
|--------------------|-----------------------|
| ALL:               | ALL GLIOMA(454)       |
| ASTRO:             | ASTROCYTOMA(148)      |
| GBM:               | GBM(228)              |
| MIXED:             | MIXED(11)             |
| NON-TUMOR:         | NON-TUMOR(28)         |
| OLIGODENDROGLIOMA: | OLIGODENDROGLIOMA(67) |
| UNKNOWN:           | UNKNOWN(67)           |
